# Supplementary material
Source: Springer Nature journal article supplement (https://www.springermedizin.de/resource/supplementary/12958_2013_1117_MOESM10_ESM.pdf/9566852)

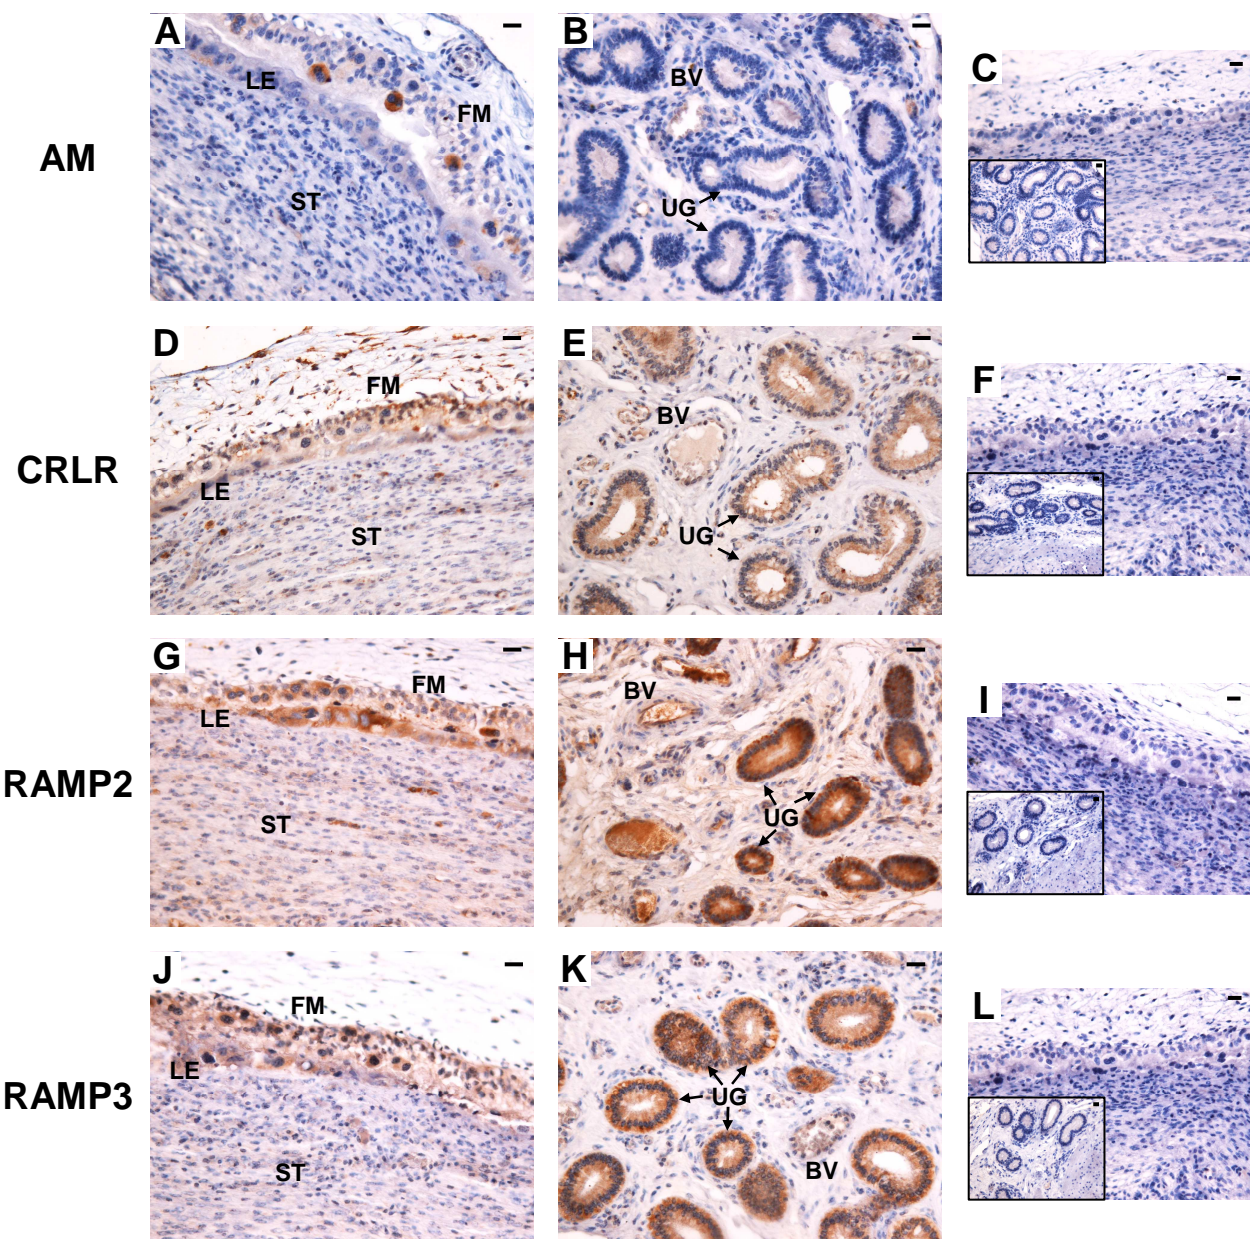

Supplement: MOESM10 [file 9566852]
